# Supplementary material
Source: PubMed Central journal article supplement (PMC3411956)
Supplement: 1202630109_pnas.201202630SI.pdf [file 1202630109_pnas.201202630SI.pdf]

# Supporting Information

Zheng et al. 10.1073/pnas.1202630109

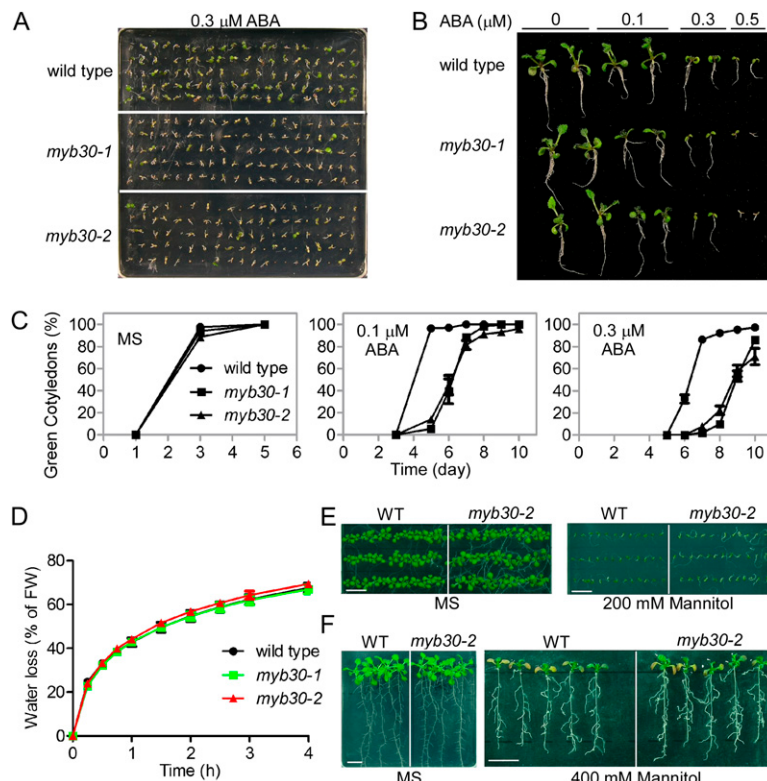

**Fig. S1.** *myb30-1* and *myb30-2* have similar responses to abscisic acid (ABA) and osmotic/drought stress. (A) *myb30-1* and *myb30-2* are hypersensitive to ABA. Seeds were sown on Murashige and Skoog (MS) medium containing 0.3  $\mu$ M ABA; photographs were taken after 6 d. (B) Twelve-day-old seedlings of wild-type and the mutants grown without or with 0.1, 0.3, or 0.5  $\mu$ M ABA. (C) Green cotyledons in wild-type and the *myb30-1* and *myb30-2* mutants were scored at the indicated times and represent an average of 100 seeds from three independent experiments  $\pm$  SE. (D) Water loss from wild-type and the *myb30-1* and *myb30-2* mutants was measured using detached leaves. Water loss is expressed as a percentage of the initial fresh weight (FW). Data from one representative experiment of three. (E) Wild-type and *myb30-2* seeds were sown on MS medium (Left) or MS medium containing 200 mM mannitol (Right). Photographs were taken after 8 d. (Scale bars, 1 cm.) (F) Six-day-old wild-type and *myb30-2* seedlings were transferred from MS medium to MS medium without (Left) or with 400 mM mannitol (Right) and photographs were taken 8 d after transfer. (Scale bars, 1 cm.)

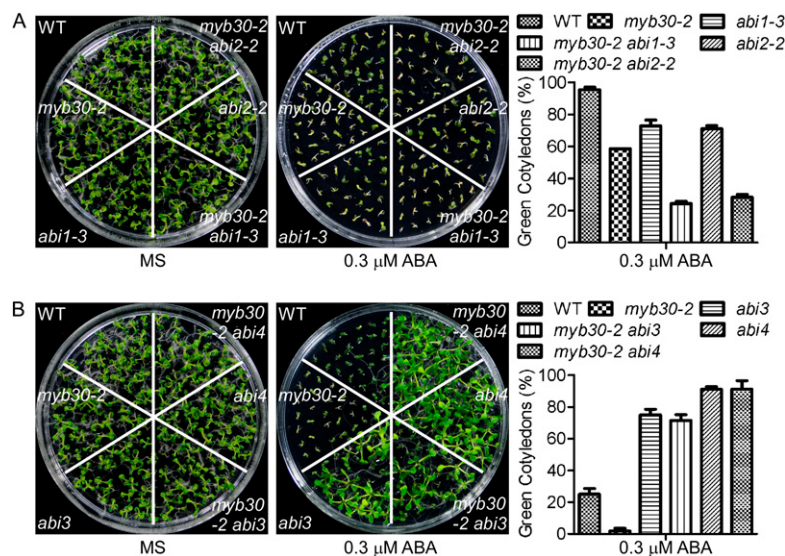

**Fig. S2.** ABA phenotypes of the *myb30-2 abi* double-mutants. (A) ABA phenotype of the *myb30-2 abi1-3* and *myb30-2 abi2-2* double-mutants. Seeds were sown on MS medium without (Left) or with 0.3  $\mu$ M ABA (Right) and photographs were taken after 9 d. The mean germination value for wild-type and the *myb30-2*, *abi1-3*, *abi2-2*, and *myb30 abi1-3* and *myb30 abi2-2* double-mutants in response to 0.3  $\mu$ M ABA is shown in the graph to the right of the images. Green cotyledons were scored after 6 d of growth and represent an average of 100 seeds from at least three independent experiments  $\pm$  SE. (B) ABA phenotype of the *myb30-2 abi3* and *myb30-2 abi4* double-mutants. Seeds were sown on MS medium without (Left) or with 0.3  $\mu$ M ABA (Right) and photographs were taken after 6 d. The mean germination value for wild-type and the *myb30-2*, *abi3*, *abi4*, and *myb30-2 abi3* and *myb30-2 abi4* double-mutants in response to 0.3  $\mu$ M ABA is shown in the graph to the right of the images. Green cotyledons were scored after 6 d of growth and represent an average of 100 seeds from at least three independent experiments  $\pm$  SE.

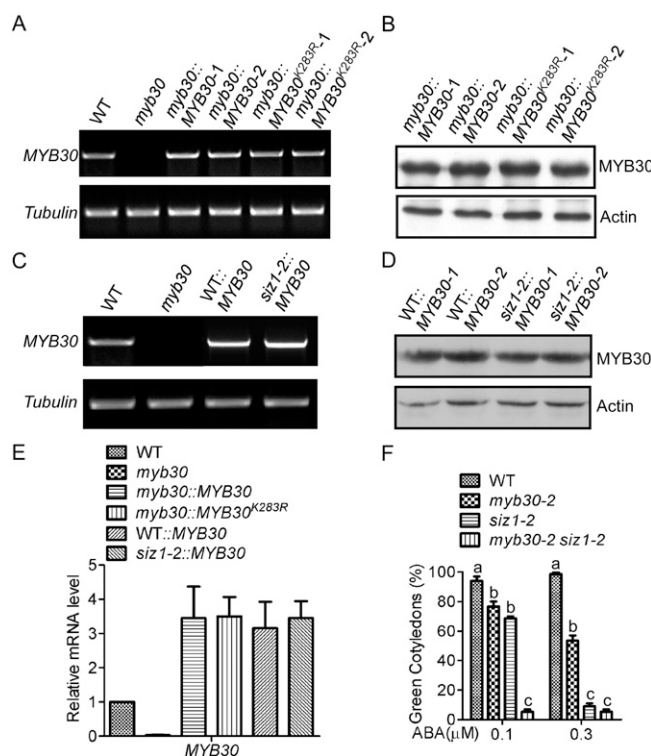

**Fig. S3.** Overexpression of *MYB30* and *MYB30*<sup>K283R</sup> in wild-type and the *siz1-2* mutant. RNA and protein were extracted from 7-d-old seedlings without ABA treatment. (A) Transcript abundance of *MYB30* and *MYB30*<sup>K283R</sup> in wild-type and *myb30-2* transgenic lines was monitored using RT-PCR. Shown are RT-PCR products after 30 cycles with *MYB30* gene-specific or *Tubulin* gene-specific primers as a loading control. (B) *MYB30* and *MYB30*<sup>K283R</sup> protein levels in the transgenic lines were detected by immunoblot analysis using an anti-Flag antibody. Actin was used as a loading control. (C) Transcript abundance of *MYB30* in wild-type and *siz1-2* transgenic lines was monitored by RT-PCR with *MYB30* gene-specific primers. *Tubulin* was included as a loading control. (D) *MYB30* protein levels in wild-type and *siz1-2* transgenic lines were detected by immunoblot analysis using an anti-Flag antibody. (E) Transcript abundance of *MYB30* in wild-type, *myb30-2*, and different transgenic lines was determined by quantitative PCR. mRNA levels are expressed relative to the value of wild-type seedlings. Data represent means  $\pm$  SD of three independent experiments. (F) Germination frequencies were determined for WT, the *myb30-2* and *siz1-2* single mutants and the *myb30-2 siz1-2* double-mutant seeds sown on MS medium with 0.1  $\mu$ M ABA or 0.3  $\mu$ M ABA. Green cotyledons were scored after 7 (0.1  $\mu$ M) or 9 d (0.3  $\mu$ M) ABA. Data represent an average of 100 seeds from three independent experiments  $\pm$  SE. Based on a Student *t* test, genotypes with different letters are statistically different; *P* < 0.05.

**Fig. S4.** Localization and transcriptional activity analysis of MYB30<sup>K283R</sup>. (A) Nuclear localization of MYB30-GFP and MYB30<sup>K283R</sup>-GFP in wild-type protoplasts. (Left) GFP fluorescence; (Center) bright field; (Right) merged image. One representative image of protoplasts from transiently transformed *Arabidopsis* leaves. (B) Transcriptional activity analysis of MYB30 and MYB30<sup>K283R</sup> using the GAL4 transient expression assay in yeast (1). Upper panel for each represents growth on synthetic complete medium without His and Thr (–H/T). Lower panel for each represents growth without Thr in the presence of X-Gal (–H/+X-Gal).

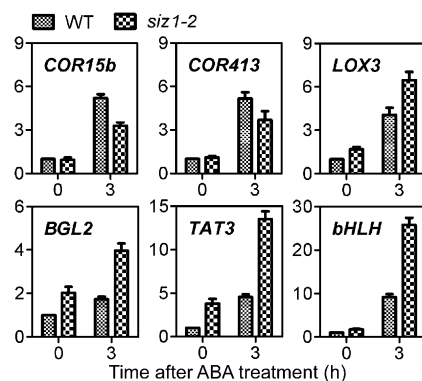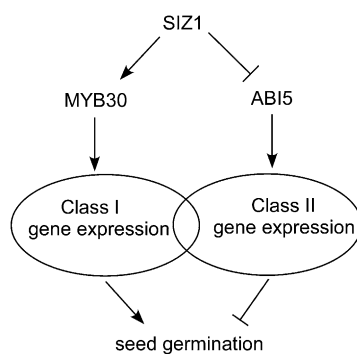

**Table S1. Changes in gene expression in the *myb30* mutant during ABA treatment**

|    | Gene      | WT    | Mutant | Log(wt/mutant) | AA wt  | ABA mutant | Log(wt/mutant) | Log(ABA wt/wt) | Log(ABA m/m) | Function                                                                 |
|----|-----------|-------|--------|----------------|--------|------------|----------------|----------------|--------------|--------------------------------------------------------------------------|
| 1  | AT1G64360 | 29    | 40     | -0.4441        | 76     | 31         | 1.2947         | 1.3678         | -0.3710      | Unknown protein                                                          |
| 2  | AT1G73120 | 54    | 75     | -0.4620        | 145    | 67         | 1.1032         | 1.4107         | -0.1545      | Unknown protein                                                          |
| 3  | AT1G15330 | 52    | 47     | 0.1533         | 174    | 87         | 0.9951         | 1.7346         | 0.8928       | Cystathionine $\beta$ -synthase (CBS) protein                            |
| 4  | AT2G42530 | 638   | 903    | -0.5009        | 4,209  | 2,220      | 0.9225         | 2.7214         | 1.2980       | Cold regulated 15b (COR15B)                                              |
| 5  | AT4G21630 | 13    | 3      | 2.1229         | 37     | 20         | 0.9098         | 1.5154         | 2.7286       | Subtilase family protein                                                 |
| 6  | AT4G25580 | 15    | 5      | 1.6084         | 102    | 54         | 0.9080         | 2.7360         | 3.4364       | CAP160 protein                                                           |
| 7  | AT2G37900 | 37    | 35     | 0.0811         | 133    | 73         | 0.8682         | 1.8458         | 1.0587       | Major facilitator superfamily protein                                    |
| 8  | AT1G57590 | 29    | 32     | -0.1222        | 118    | 66         | 0.8310         | 2.0037         | 1.0505       | Pectinacetylase family protein                                           |
| 9  | AT1G66390 | 109   | 172    | -0.6595        | 580    | 330        | 0.8128         | 2.4136         | 0.9413       | myb domain protein 90 (MYB90)                                            |
| 10 | AT1G29395 | 757   | 822    | -0.1192        | 4,322  | 2,509      | 0.7847         | 2.5136         | 1.6097       | COLD REGULATED 314 INNER MEMBRANE 1 (COR413IM1)                          |
| 11 | AT5G42200 | 27    | 20     | 0.4449         | 92     | 54         | 0.7688         | 1.7603         | 1.4364       | RING/U-box superfamily protein                                           |
| 12 | AT1G01250 | 42    | 18     | 1.2384         | 90     | 53         | 0.7615         | 1.0818         | 1.5586       | Integrase-type DNA-binding superfamily protein                           |
| 13 | AT1G23200 | 21    | 23     | -0.1527        | 169    | 101        | 0.7518         | 3.0323         | 2.1278       | Plant invertase/pectin methylesterase inhibitor superfamily              |
| 14 | AT5G01595 | 1,177 | 1,224  | -0.0563        | 3,914  | 2,364      | 0.7276         | 1.7335         | 0.9496       | Other RNA                                                                |
| 15 | AT3G20340 | 81    | 70     | 0.2031         | 184    | 112        | 0.7253         | 1.1947         | 0.6725       | FUNCTIONS IN: molecular_function unknown                                 |
| 16 | AT1G74810 | 42    | 30     | 0.5015         | 111    | 67         | 0.7188         | 1.3848         | 1.1674       | BOR5                                                                     |
| 17 | AT2G19810 | 118   | 89     | 0.4021         | 537    | 327        | 0.7158         | 2.1910         | 1.8773       | CCCH-type zinc finger family protein                                     |
| 18 | AT5G24780 | 462   | 732    | -0.6648        | 3,123  | 1,931      | 0.6936         | 2.7578         | 1.3994       | Vegetative storage protein 1 (VSP1)                                      |
| 19 | AT5G37300 | 16    | 9      | 0.8599         | 169    | 105        | 0.6898         | 3.3734         | 3.5435       | WSD1                                                                     |
| 20 | AT5G54585 | 11    | 17     | -0.6426        | 41     | 25         | 0.6854         | 1.9077         | 0.5797       | Unknown protein                                                          |
| 21 | AT3G21890 | 39    | 53     | -0.4350        | 198    | 124        | 0.6818         | 2.3398         | 1.2230       | B-box type zinc-finger family protein                                    |
| 22 | AT1G10640 | 98    | 73     | 0.4250         | 240    | 150        | 0.6788         | 1.2950         | 1.0412       | Pectin lyase-like superfamily protein                                    |
| 23 | AT5G01600 | 1,595 | 1,653  | -0.0512        | 4,893  | 3,095      | 0.6606         | 1.6168         | 0.9050       | Ferretin 1 (FER1)                                                        |
| 24 | AT3G27660 | 59    | 55     | 0.0965         | 120    | 76         | 0.6577         | 1.0320         | 0.4708       | Oleosin 4 (OLEO4)                                                        |
| 25 | AT1G51090 | 62    | 55     | 0.1745         | 156    | 101        | 0.6380         | 1.3336         | 0.8700       | Heavy metal transport/detoxification superfamily protein                 |
| 26 | AT3G62740 | 160   | 105    | 0.6084         | 358    | 232        | 0.6276         | 1.1628         | 1.1436       | $\beta$ -Glucosidase 7 (BGLU7)                                           |
| 27 | AT1G48100 | 140   | 126    | 0.1569         | 703    | 462        | 0.6060         | 2.3228         | 1.8737       | Pectin lyase-like superfamily protein                                    |
| 28 | AT2G37580 | 36    | 31     | 0.2131         | 98     | 65         | 0.5894         | 1.4483         | 1.0720       | RING/U-box superfamily protein                                           |
| 29 | AT1G02670 | 25    | 24     | 0.0615         | 71     | 48         | 0.5842         | 1.5075         | 0.9849       | P-loop containing nucleoside triphosphate hydrolases superfamily protein |
| 30 | AT3G28220 | 2,030 | 1821   | 0.1566         | 6,316  | 4,236      | 0.5761         | 1.6376         | 1.2181       | TRAF-like family protein                                                 |
| 31 | AT1G18810 | 66    | 55     | 0.2723         | 263    | 177        | 0.5716         | 1.9834         | 1.6842       | Phytochrome kinase substrate-related                                     |
| 32 | AT5G57790 | 19    | 26     | -0.4900        | 85     | 57         | 0.5691         | 2.2027         | 1.1436       | Unknown protein                                                          |
| 33 | AT1G67600 | 24    | 54     | -1.1725        | 57     | 39         | 0.5651         | 1.2556         | -0.4820      | Acid phosphatase/vanadium-dependent haloperoxidase-related protein       |
| 34 | AT4G12430 | 22    | 23     | -0.0787        | 62     | 42         | 0.5597         | 1.5064         | 0.8680       | Haloacid dehalogenase-like hydrolase (HAD) superfamily protein           |
| 35 | AT4G12432 | 22    | 23     | -0.0787        | 62     | 42         | 0.5597         | 1.5064         | 0.8680       | Conserved peptide upstream ORF 26 (CPuORF26)                             |
| 36 | AT2G42540 | 2,732 | 3,113  | -0.1882        | 25,841 | 7,828      | 0.5355         | 3.2415         | 2.5178       | Cold-regulated 15a (COR15A)                                              |
| 37 | AT1G22160 | 30    | 23     | 0.4067         | 189    | 131        | 0.5248         | 2.6329         | 2.5149       | Protein of unknown function (DUF581)                                     |
| 38 | AT5G10946 | 23    | 23     | -0.0083        | 67     | 46         | 0.5203         | 1.5409         | 1.0124       | Unknown protein                                                          |
| 39 | AT4G31330 | 117   | 124    | -0.0898        | 233    | 163        | 0.5141         | 1.0028         | 0.3989       | Protein of unknown function, DUF599                                      |
| 40 | AT5G53870 | 71    | 53     | 0.4174         | 262    | 183        | 0.5120         | 1.8854         | 1.7907       | Early nodulin-like protein 1 (ENODL1)                                    |
| 41 | AT1G72490 | 21    | 21     | -0.0214        | 53     | 38         | 0.5041         | 1.3443         | 0.8387       | Unknown protein                                                          |
| 42 | AT4G11910 | 35    | 37     | -0.0865        | 162    | 230        | -0.5018        | 2.2193         | 2.6346       | INVOLVED IN: biological_process unknown                                  |
| 43 | AT1G63370 | 38    | 42     | -0.1401        | 202    | 286        | -0.5025        | 2.4057         | 2.7681       | Flavin-binding monooxygenase family protein                              |
| 44 | AT4G37150 | 383   | 561    | -0.5495        | 1,028  | 1,457      | -0.5025        | 1.4239         | 1.3770       | Methyl esterase 9 (MES9)                                                 |
| 45 | AT2G30362 | 246   | 382    | -0.6343        | 948    | 1,343      | -0.5029        | 1.9455         | 1.8141       | Other RNA                                                                |
| 46 | AT1G52565 | 24    | 38     | -0.6655        | 226    | 321        | -0.5052        | 3.2408         | 3.0805       | Unknown protein                                                          |
| 47 | AT3G22740 | 57    | 99     | -0.8060        | 191    | 272        | -0.5052        | 1.7575         | 1.4568       | Homocysteine S-methyltransferase 3 (HMT3)                                |

Table S1. Cont.

|    | Gene             | WT  | Mutant | Log(wt/mutant) | AA wt | ABA mutant | Log(wt/mutant) | Log(ABA wt/wt) | Log(ABA m/m) | Function                                                            |
|----|------------------|-----|--------|----------------|-------|------------|----------------|----------------|--------------|---------------------------------------------------------------------|
| 48 | <i>AT4G28085</i> | 59  | 83     | -0.4972        | 184   | 262        | -0.5052        | 1.6493         | 1.6573       | Unknown protein                                                     |
| 49 | <i>AT5G04390</i> | 12  | 19     | -0.6655        | 35    | 50         | -0.5052        | 1.5478         | 1.3875       | C2H2-type zinc finger family protein                                |
| 50 | <i>AT5G18270</i> | 179 | 234    | -0.3899        | 489   | 695        | -0.5064        | 1.4536         | 1.5701       | <i>Arabidopsis</i> NAC domain containing protein 87 (ANAC087)       |
| 51 | <i>AT5G41040</i> | 519 | 544    | -0.0667        | 2,846 | 4,047      | -0.5080        | 2.4540         | 2.8953       | HXXD-type acyl-transferase family protein                           |
| 52 | <i>AT1G56650</i> | 64  | 80     | -0.3163        | 360   | 511        | -0.5084        | 2.4845         | 2.6765       | Production of anthocyanin pigment 1 (PAP1)                          |
| 53 | <i>AT1G64610</i> | 131 | 171    | -0.3880        | 320   | 455        | -0.5087        | 1.2915         | 1.4122       | Transducin/WD40 repeat-like superfamily protein                     |
| 54 | <i>AT5G57550</i> | 23  | 41     | -0.8423        | 125   | 178        | -0.5097        | 2.4495         | 2.1170       | Xyloglucan endotransglucosylase/hydrolase 25 (XTH25)                |
| 55 | <i>AT2G38750</i> | 313 | 684    | -1.1300        | 696   | 991        | -0.5101        | 1.1546         | 0.5347       | Annexin 4 (ANNAT4)                                                  |
| 56 | <i>AT3G02875</i> | 265 | 323    | -0.2876        | 621   | 886        | -0.5125        | 1.2308         | 1.4557       | IAA-LEUCINE RESISTANT 1 (ILR1)                                      |
| 57 | <i>AT1G47510</i> | 40  | 80     | -0.9895        | 339   | 484        | -0.5152        | 3.0708         | 2.5965       | Inositol polyphosphate 5-phosphatase 11 (5PTASE11)                  |
| 58 | <i>AT5G26010</i> | 37  | 57     | -0.6225        | 86    | 124        | -0.5182        | 1.2224         | 1.1181       | Protein phosphatase 2C family protein                               |
| 59 | <i>AT1G69480</i> | 74  | 103    | -0.4761        | 1,020 | 1,461      | -0.5184        | 3.7844         | 3.8267       | EXS (ERD1/XPR1/SYG1) family protein                                 |
| 60 | <i>AT3G22600</i> | 977 | 1,119  | -0.1961        | 5,643 | 8,094      | -0.5203        | 2.5304         | 2.8546       | Lipid-transfer protein/seed storage 2S albumin superfamily protein  |
| 61 | <i>AT1G64380</i> | 106 | 189    | -0.8394        | 445   | 638        | -0.5216        | 2.0741         | 1.7563       | Integrase-type DNA-binding superfamily protein                      |
| 62 | <i>AT2G39030</i> | 105 | 447    | -2.0962        | 2,845 | 4,091      | -0.5239        | 4.7663         | 3.1939       | Acyl-CoA <i>N</i> -acyltransferases (NAT) superfamily protein       |
| 63 | <i>AT2G23540</i> | 128 | 145    | -0.1743        | 357   | 514        | -0.5240        | 1.4751         | 1.8248       | GDSL-like Lipase/Acylhydrolase superfamily protein                  |
| 64 | <i>AT5G09980</i> | 25  | 45     | -0.8453        | 58    | 84         | -0.5244        | 1.2207         | 0.8997       | Elicitor peptide 4 precursor (PROPEP4)                              |
| 65 | <i>AT3G61190</i> | 41  | 78     | -0.9145        | 98    | 141        | -0.5280        | 1.2448         | 0.8582       | BON association protein 1 (BAP1)                                    |
| 66 | <i>AT1G68620</i> | 364 | 475    | -0.3851        | 2,347 | 3,386      | -0.5290        | 2.6896         | 2.8335       | $\alpha/\beta$ -Hydrolases superfamily protein                      |
| 67 | <i>AT1G66830</i> | 3   | 17     | -2.3796        | 62    | 89         | -0.5322        | 4.2433         | 2.3960       | Leucine-rich repeat protein kinase family protein                   |
| 68 | <i>AT1G35910</i> | 20  | 29     | -0.5651        | 76    | 110        | -0.5418        | 1.9528         | 1.9295       | Haloacid dehalogenase-like hydrolase (HAD) superfamily protein      |
| 69 | <i>AT2G01275</i> | 11  | 17     | -0.6426        | 30    | 44         | -0.5418        | 1.4789         | 1.3781       | RING/FYVE/PHD zinc finger superfamily protein                       |
| 70 | <i>AT4G39670</i> | 144 | 360    | -1.3245        | 739   | 1077       | -0.5435        | 2.3620         | 1.5810       | Glycolipid transfer protein (GLTP) family protein                   |
| 71 | <i>AT1G56320</i> | 79  | 78     | 0.0274         | 300   | 437        | -0.5440        | 1.9162         | 2.4876       | BEST protein match is: Glycine-rich protein family (TAIR:AT5G49350) |
| 72 | <i>AT2G43570</i> | 160 | 293    | -0.8721        | 714   | 1044       | -0.5471        | 2.1581         | 1.8330       | Chitinase, putative (CHI)                                           |
| 73 | <i>AT4G24130</i> | 377 | 349    | 0.1105         | 1,973 | 2,883      | -0.5473        | 2.3885         | 3.0463       | Protein of unknown function, DUF538                                 |
| 74 | <i>AT1G79450</i> | 73  | 66     | 0.1446         | 167   | 244        | -0.5483        | 1.1941         | 1.8871       | ALA-interacting subunit 5 (ALIS5)                                   |
| 75 | <i>AT4G20460</i> | 119 | 204    | -0.7813        | 270   | 394        | -0.5483        | 1.1839         | 0.9510       | NAD(P)-binding Rossmann-fold superfamily protein                    |
| 76 | <i>AT3G59930</i> | 233 | 377    | -0.6940        | 723   | 1,063      | -0.5564        | 1.6327         | 1.4951       | FUNCTIONS IN: molecular_function unknown                            |
| 77 | <i>AT4G25000</i> | 10  | 45     | -2.1990        | 229   | 337        | -0.5582        | 4.5452         | 2.9044       | $\alpha$ -Amylase-like (AMY1)                                       |
| 78 | <i>AT1G23800</i> | 390 | 436    | -0.1614        | 1,833 | 2,717      | -0.5682        | 2.2331         | 2.6399       | Nuclear gene for mitochondrial product                              |
| 79 | <i>AT5G17450</i> | 50  | 69     | -0.4620        | 138   | 205        | -0.5768        | 1.4594         | 1.5742       | Heavy metal transport/detoxification superfamily protein            |
| 80 | <i>AT1G09240</i> | 174 | 349    | -1.0022        | 355   | 530        | -0.5792        | 1.0264         | 0.6034       | Nicotianamine synthase 3 (NAS3)                                     |
| 81 | <i>AT2G30360</i> | 348 | 477    | -0.4530        | 1,331 | 1,992      | -0.5816        | 1.9333         | 2.0619       | SOS3-interacting protein 4 (SIP4)                                   |
| 82 | <i>AT3G48520</i> | 611 | 855    | -0.4850        | 3,514 | 5,288      | -0.5896        | 2.5241         | 2.6287       | Cytochrome P450, family 94, subfamily B, polypeptide 3 (CYP94B3)    |
| 83 | <i>AT3G46660</i> | 170 | 358    | -1.0755        | 1,026 | 1,544      | -0.5897        | 2.5947         | 2.1089       | UDP-glucosyl transferase 76E12 (UGT76E12)                           |
| 84 | <i>AT1G02310</i> | 11  | 43     | -1.9814        | 116   | 176        | -0.6038        | 3.4078         | 2.0302       | Glycosyl hydrolase superfamily protein                              |
| 85 | <i>AT4G37432</i> | 329 | 244    | 0.4306         | 1,031 | 1,569      | -0.6057        | 1.6482         | 2.6845       | Other RNA                                                           |
| 86 | <i>AT2G38760</i> | 111 | 141    | -0.3442        | 326   | 496        | -0.6067        | 1.5521         | 1.8146       | Annexin 3 (ANNAT3)                                                  |
| 87 | <i>AT2G34610</i> | 42  | 34     | 0.3209         | 356   | 543        | -0.6101        | 3.0676         | 3.9986       | Unknown protein                                                     |
| 88 | <i>AT5G45070</i> | 42  | 52     | -0.2921        | 107   | 165        | -0.6159        | 1.3385         | 1.6623       | Phloem protein 2-A8 (PP2-A8)                                        |
| 89 | <i>AT1G45145</i> | 723 | 1,199  | -0.7296        | 1,597 | 2,451      | -0.6181        | 1.1432         | 1.0317       | Thioredoxin H-type 5 (TRX5)                                         |
| 90 | <i>AT5G33355</i> | 72  | 119    | -0.7275        | 221   | 339        | -0.6201        | 1.6182         | 1.5109       | Defensin-like (DEFL) family protein                                 |
| 91 | <i>AT3G05630</i> | 148 | 243    | -0.7144        | 602   | 929        | -0.6250        | 2.0241         | 1.9347       | Phospholipase D P2 (PLDP2)                                          |
| 92 | <i>AT3G60966</i> | 17  | 32     | -0.8771        | 71    | 110        | -0.6334        | 2.0311         | 1.7875       | RING/U-box superfamily protein                                      |
| 93 | <i>AT2G22500</i> | 267 | 490    | -0.8771        | 872   | 1,354      | -0.6351        | 1.7087         | 1.4667       | Uncoupling protein 5 (UCP5)                                         |
| 94 | <i>AT3G51440</i> | 108 | 189    | -0.8099        | 309   | 481        | -0.6353        | 1.5209         | 1.3462       | Calcium-dependent phosphotriesterase superfamily protein            |
| 95 | <i>AT1G18100</i> | 52  | 81     | -0.6319        | 109   | 170        | -0.6479        | 1.0546         | 1.0705       | E12A11                                                              |
| 96 | <i>AT2G36770</i> | 90  | 169    | -0.9029        | 326   | 511        | -0.6510        | 1.8494         | 1.5976       | UDP-Glycosyltransferase superfamily protein                         |

Table S1. Cont.

|     | Gene      | WT    | Mutant | Log(wt/mutant) | AA wt  | ABA mutant | Log(wt/mutant) | Log(ABA wt/wt) | Log(ABA m/m) | Function                                                                    |
|-----|-----------|-------|--------|----------------|--------|------------|----------------|----------------|--------------|-----------------------------------------------------------------------------|
| 97  | AT3G44860 | 152   | 642    | -2.0742        | 386    | 609        | -0.6555        | 1.3418         | -0.0769      | Farnesoic acid carboxyl-O-methyltransferase (FAMT)                          |
| 98  | AT5G42510 | 40    | 66     | -0.7120        | 210    | 331        | -0.6572        | 2.3828         | 2.3280       | Disease resistance-responsive (dirigent-like protein) family protein        |
| 99  | AT1G19200 | 42    | 98     | -1.2064        | 285    | 451        | -0.6620        | 2.7457         | 2.2013       | Protein of unknown function (DUF581)                                        |
| 100 | AT2G43510 | 1,079 | 1,629  | -0.5941        | 2,162  | 3,421      | -0.6621        | 1.0025         | 1.0705       | Trypsin inhibitor protein 1 (T11)                                           |
| 101 | AT4G34230 | 2,762 | 5,039  | -0.8676        | 11,694 | 18,562     | -0.6665        | 2.0822         | 1.8811       | Cinnamyl alcohol dehydrogenase 5 (CAD5)                                     |
| 102 | AT3G56730 | 13    | 13     | 0.0075         | 29     | 46         | -0.6687        | 1.1593         | 1.8355       | Putative endonuclease or glycosyl hydrolase                                 |
| 103 | AT2G38340 | 14    | 30     | -1.0835        | 113    | 180        | -0.6691        | 2.9998         | 2.5854       | Integrase-type DNA-binding superfamily protein                              |
| 104 | AT5G09470 | 58    | 109    | -0.9173        | 195    | 310        | -0.6710        | 1.7562         | 1.5098       | Dicarboxylate carrier 3 (DIC3)                                              |
| 105 | AT5G64190 | 20    | 29     | -0.5651        | 44     | 71         | -0.6724        | 1.1784         | 1.2856       | Unknown protein                                                             |
| 106 | AT5G14700 | 97    | 168    | -0.7936        | 297    | 473        | -0.6731        | 1.6133         | 1.4927       | NAD(P)-binding Rossmann-fold superfamily protein                            |
| 107 | AT1G09170 | 16    | 19     | -0.2181        | 53     | 84         | -0.6764        | 1.6853         | 2.1436       | P-loop nucleoside triphosphate hydrolases superfamily protein               |
| 108 | AT2G34810 | 444   | 740    | -0.7360        | 4,080  | 6,530      | -0.6784        | 3.1990         | 3.1414       | FAD-binding Berberine family protein                                        |
| 109 | AT4G00700 | 49    | 89     | -0.8609        | 130    | 208        | -0.6805        | 1.4029         | 1.2225       | C2 calcium/lipid-binding plant phosphoribosyltransferase family protein     |
| 110 | AT1G32350 | 29    | 264    | -3.1666        | 225    | 361        | -0.6810        | 2.9379         | 0.4523       | Alternative oxidase 1D (AOX1D)                                              |
| 111 | AT2G02990 | 528   | 1,401  | -1.4075        | 2,101  | 3,434      | -0.7087        | 1.9923         | 1.2936       | Ribonuclease 1 (RNS1)                                                       |
| 112 | AT2G35585 | 12    | 15     | -0.3245        | 26     | 42         | -0.7088        | 1.1004         | 1.4846       | Unknown protein                                                             |
| 113 | AT2G22930 | 26    | 39     | -0.5775        | 69     | 113        | -0.7101        | 1.3980         | 1.5306       | UDP-Glycosyltransferase superfamily protein                                 |
| 114 | AT4G33467 | 17    | 42     | -1.2694        | 1,578  | 2,583      | -0.7105        | 6.5012         | 5.9423       | Unknown protein                                                             |
| 115 | AT3G43270 | 420   | 816    | -0.9570        | 1,452  | 2,385      | -0.7157        | 1.7887         | 1.5473       | Plant invertase/pectin methyltransferase inhibitor superfamily              |
| 116 | AT4G30290 | 75    | 215    | -1.5167        | 231    | 380        | -0.7172        | 1.6212         | 0.8217       | Xyloglucan endotransglucosylase/hydrolase 19                                |
| 117 | AT3G25180 | 5     | 47     | -3.1097        | 28     | 46         | -0.7276        | 2.3634         | -0.0187      | Cytochrome P450, family 82, subfamily G, polypeptide 1 (CYP82G1)            |
| 118 | AT4G10500 | 30    | 91     | -1.5775        | 128    | 213        | -0.7314        | 2.0744         | 1.2283       | 2-Oxoglutarate (2OG) and Fe(II)-dependent oxygenase superfamily protein     |
| 119 | AT5G23220 | 48    | 50     | -0.0615        | 153    | 255        | -0.7386        | 1.6744         | 2.3515       | Nicotinamidase 3 (NIC3)                                                     |
| 120 | AT1G71520 | 39    | 62     | -0.6613        | 100    | 168        | -0.7419        | 1.3567         | 1.4373       | Integrase-type DNA-binding superfamily protein                              |
| 121 | AT5G28237 | 4     | 28     | -2.6844        | 58     | 98         | -0.7522        | 3.7442         | 1.8120       | Pyridoxal-5'-phosphate-dependent enzyme family protein                      |
| 122 | AT2G47190 | 21    | 42     | -1.0214        | 149    | 252        | -0.7532        | 2.8524         | 2.5842       | myb domain protein 2 (MYB2)                                                 |
| 123 | AT4G35783 | 14    | 14     | 0.0160         | 98     | 166        | -0.7568        | 2.7922         | 3.5651       | ROTUNDIFOLIA like 6 (RTFL6)                                                 |
| 124 | AT5G02420 | 23    | 38     | -0.7327        | 103    | 175        | -0.7646        | 2.1675         | 2.1995       | Unknown protein                                                             |
| 125 | AT5G02170 | 28    | 38     | -0.4245        | 69     | 117        | -0.7656        | 1.2826         | 1.6236       | Transmembrane amino acid transporter family protein                         |
| 126 | AT5G05340 | 63    | 90     | -0.5109        | 263    | 447        | -0.7683        | 2.0562         | 2.3135       | Peroxidase superfamily protein                                              |
| 127 | AT4G11890 | 100   | 227    | -1.1800        | 209    | 358        | -0.7763        | 1.0606         | 0.6569       | Protein kinase superfamily protein                                          |
| 128 | AT1G61800 | 103   | 268    | -1.3733        | 390    | 672        | -0.7845        | 1.9142         | 1.3254       | Glucose-6-phosphate/phosphate translocator 2 (GPT2)                         |
| 129 | AT4G37430 | 325   | 276    | 0.2336         | 1,232  | 2,129      | -0.7894        | 1.9242         | 2.9472       | Cytochrome P450, family 91, subfamily A, polypeptide 2 (CYP91A2)            |
| 130 | AT5G13170 | 28    | 33     | -0.2210        | 2,077  | 3,604      | -0.7954        | 6.1968         | 6.7712       | Senescence-associated gene 29 (SAG29)                                       |
| 131 | AT5G67080 | 11    | 75     | -2.7839        | 78     | 136        | -0.7967        | 2.8445         | 0.8573       | Mitogen-activated protein kinase kinase kinase 19 (MAPKKK19)                |
| 132 | AT4G24380 | 174   | 319    | -0.8725        | 354    | 618        | -0.8038        | 1.0216         | 0.9529       | CONTAINS InterPro DOMAIN/s: Serine hydrolase (InterPro:IPR005645)           |
| 133 | AT2G14610 | 180   | 761    | -2.0825        | 522    | 926        | -0.8270        | 1.5382         | 0.2827       | Pathogenesis-related gene 1 (PR1)                                           |
| 134 | AT2G37670 | 12    | 21     | -0.8099        | 41     | 73         | -0.8354        | 1.7702         | 1.7957       | Transducin/WD40 repeat-like superfamily protein                             |
| 135 | AT5G61890 | 64    | 347    | -2.4332        | 284    | 508        | -0.8410        | 2.1425         | 0.5503       | Integrase-type DNA-binding superfamily protein                              |
| 136 | AT4G22470 | 669   | 1,632  | -1.2874        | 1,402  | 2,513      | -0.8419        | 1.0683         | 0.6228       | Protease inhibitor/seed storage/lipid transfer protein (LTP) family protein |
| 137 | AT3G03530 | 28    | 44     | -0.6360        | 124    | 222        | -0.8434        | 2.1278         | 2.3352       | Nonspecific phospholipase C4 (NPC4)                                         |
| 138 | AT3G43110 | 61    | 145    | -1.2496        | 126    | 226        | -0.8449        | 1.0479         | 0.6432       | Unknown protein                                                             |
| 139 | AT1G62370 | 101   | 109    | -0.1061        | 358    | 648        | -0.8554        | 1.8233         | 2.5726       | RING/U-box superfamily protein                                              |
| 140 | AT1G73010 | 408   | 1,184  | -1.5358        | 880    | 1,595      | -0.8577        | 1.1080         | 0.4300       | Phosphate starvation-induced gene 2 (PS2)                                   |
| 141 | AT1G06520 | 24    | 31     | -0.3718        | 82     | 151        | -0.8890        | 1.7702         | 2.2874       | Glycerol-3-phosphate acyltransferase 1 (GPAT1)                              |

Table S1. Cont.
